# Supplementary material for: NK cells contribute to reovirus-induced IFN responses and loss of tolerance to dietary antigen
Source: JCI journal article supplement (doi:10.1172/jci.insight.159823), 2022-08-21
Supplement: sd1 [file 1]

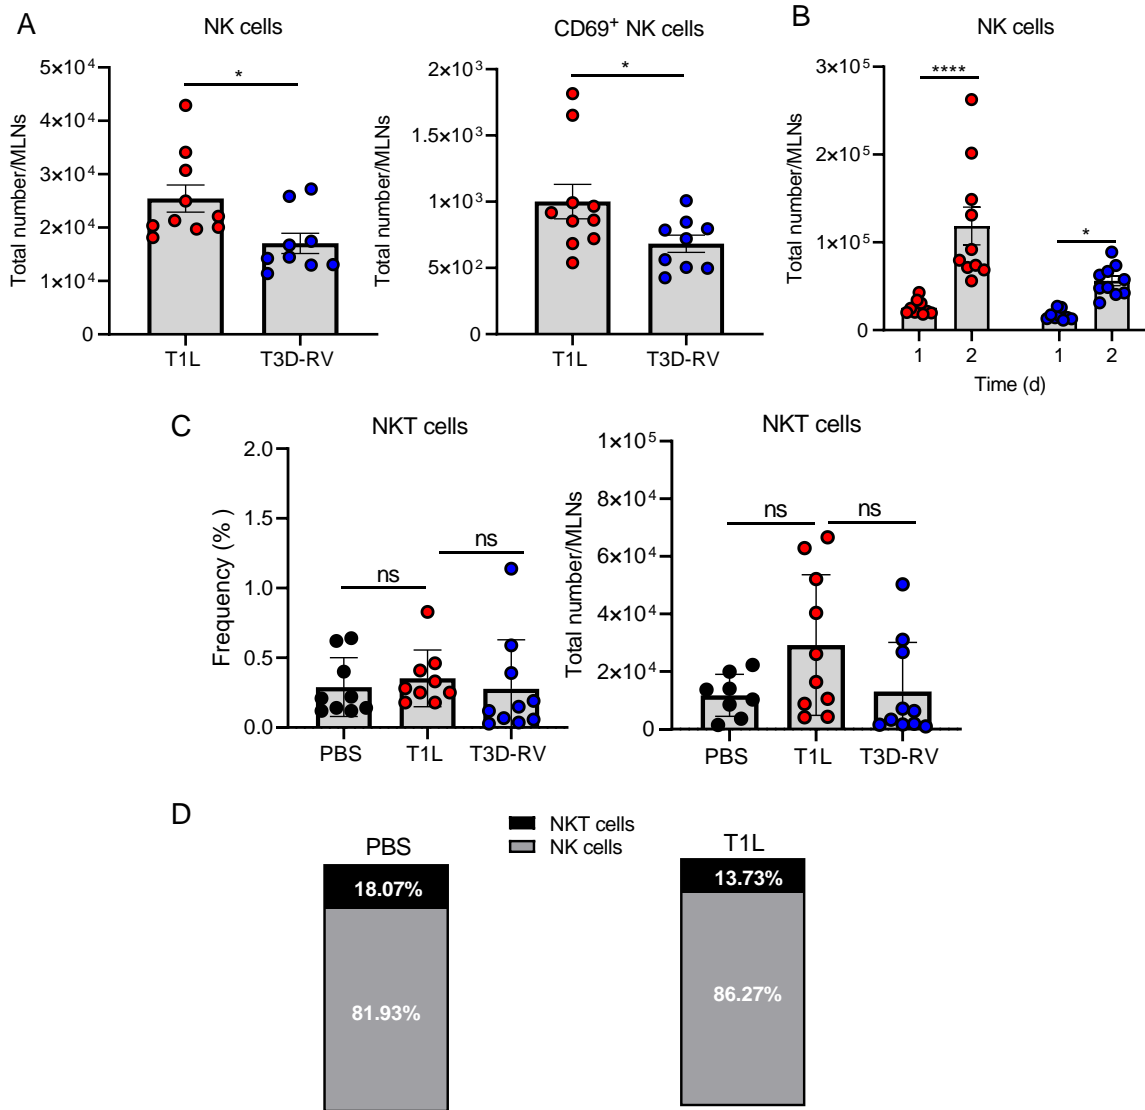

1  
2 **Supplemental Figure 1. Natural killer cells are the primary NK1.1<sup>+</sup> population in the MLNs following**  
3 **T1L infection.** WT mice were inoculated perorally with  $10^8$  PFU of T1L or T3D-RV or PBS as a control. **(A,**  
4 **B)** At 1 or 2 dpi, MLNs were resected and processed for flow cytometry. Single-cell suspensions were  
5 stained with a comprehensive antibody panel and analyzed by flow cytometry (n = 8-11). **(A)** Total cell  
6 count of NK cells (CD45<sup>+</sup> TCRβ<sup>-</sup> NK1.1<sup>+</sup>) or CD69-expressing NK cells in MLNs at 1 dpi. **(B)** Total cell count  
7 of NK cells (CD45<sup>+</sup> TCRβ<sup>-</sup> NK1.1<sup>+</sup>) or total cell count of CD69-expressing NK cells (CD45<sup>+</sup> TCRβ<sup>-</sup> NK1.1<sup>+</sup>)  
8 in MLNs at 1 or 2 dpi. **(C, D)** At 2 dpi, MLNs were resected and processed for flow cytometry (n = 9-10).  
9 **(C)** Percent frequency and total cells per MLNs of NK T cells (CD45<sup>+</sup> TCRβ<sup>+</sup> NK1.1<sup>+</sup>) **(D)** Percentage of NK  
10 or NK T cells of total NK1.1<sup>+</sup> CD45<sup>+</sup> cells from MLNs. Results are presented as mean values. Error bars

11 indicate standard errors of the mean (SEM). Statistical significance was calculated using Student's t test  
12 **(A)** or a one-way ANOVA with Tukey's multiple comparisons test **(B, C)**. \*,  $P < 0.05$ ; \*\*\*\*,  $P < 0.0001$ .

13  
14  
15  
16  
17  
18  
19  
20  
21  
22  
23  
24  
25  
26  
27  
28  
29  
30  
31  
32  
33  
34  
35  
36  
37  
38

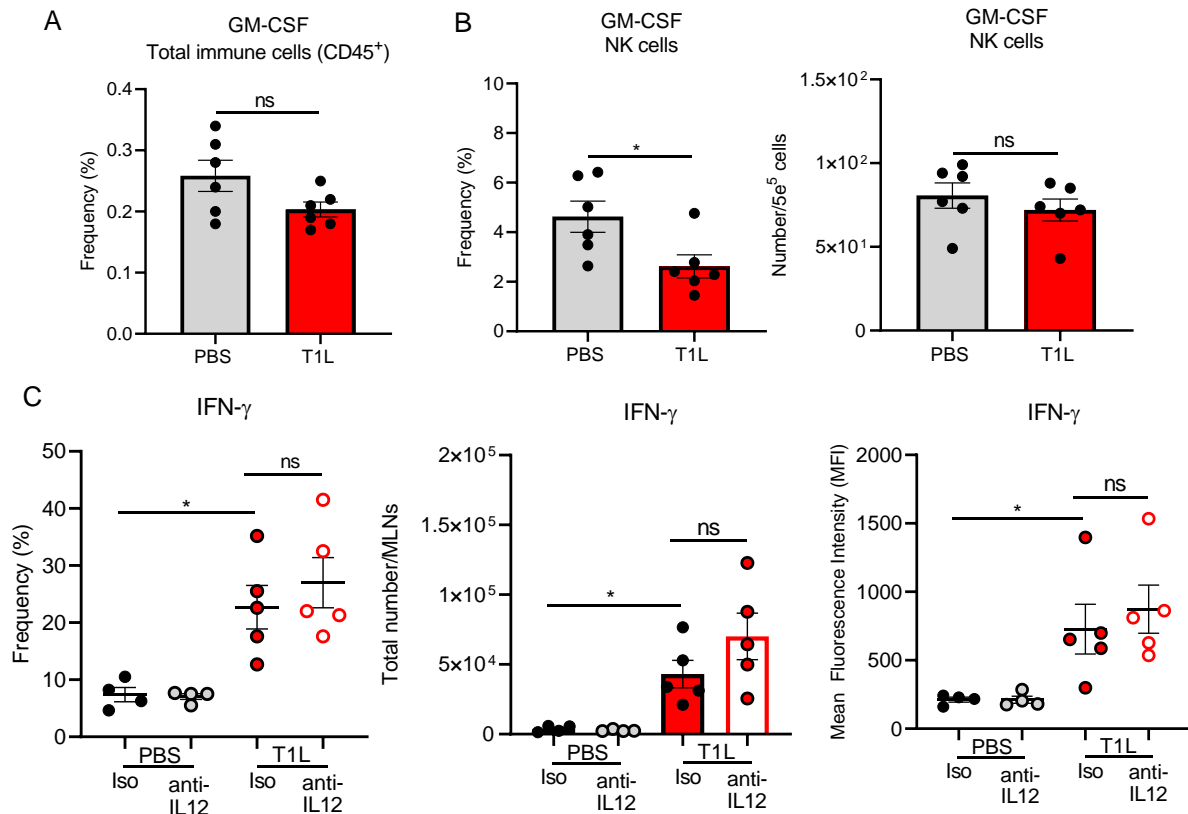

39

40 **Supplemental Figure 2. NK cells do not produce GM-CSF following T1L infection and IL-12 is not**

41 **required for type II IFN production by NK cells. (A, B)** WT mice were inoculated perorally with 10<sup>8</sup> PFU

42 of T1L or PBS as a control. At 2 dpi, MLNs were resected and processed for flow cytometry. MLN cell

43 suspensions (5 x 10<sup>6</sup> cells) were stimulated with PMA and ionomycin at 37°C for 4 hours, and cells were

44 assessed for GM-CSF production by intracellular cytokine staining. **(A)** Expression of GM-CSF in total

45 immune cells (CD45<sup>+</sup>) or **(B)** percent frequency or total number of GM-CSF in NK cells (CD45<sup>+</sup> TCR $\beta$ <sup>-</sup>

46 NK1.1<sup>+</sup>). (n= 6) **(C)** WT mice were intraperitoneally injected with either isotype control IgG2a antibody or

47 anti-IL-12p40 (C17.8) antibody one day prior to and one day following PO inoculation with 10<sup>8</sup> PFU of T1L

48 or PBS as a control. At 2 dpi, MLNs were resected and processed for flow cytometry. MLN cell suspensions

49 (5 x 10<sup>6</sup> cells) were stimulated with PMA and ionomycin at 37°C for 4 hours, and cells were assessed for IFN-

50  $\gamma$  production by intracellular cytokine staining. Total number, percentage, and MFI of NK cells (CD45<sup>+</sup> TCR $\beta$ <sup>-</sup>

51 NK1.1<sup>+</sup>) that express intracellular IFN- $\gamma$  are plotted in **(C)** (n=4-5). Results are presented as mean values.

52 Error bars indicate standard errors of the mean (SEM). Statistical significance was calculated using

53 Student's t test (**A, B**) or one-way ANOVA with Tukey's multiple comparisons test (**C**). \*,  $P < 0.05$ ; \*\*,  $P <$   
54  $0.01$ ; \*\*\*,  $P < 0.001$ ; \*\*\*\*,  $P < 0.0001$ .

55

56

57

58

59

60

61

62

63

64

65

66

67

68

69

70

71

72

73

74

75

76

77

78

79

80

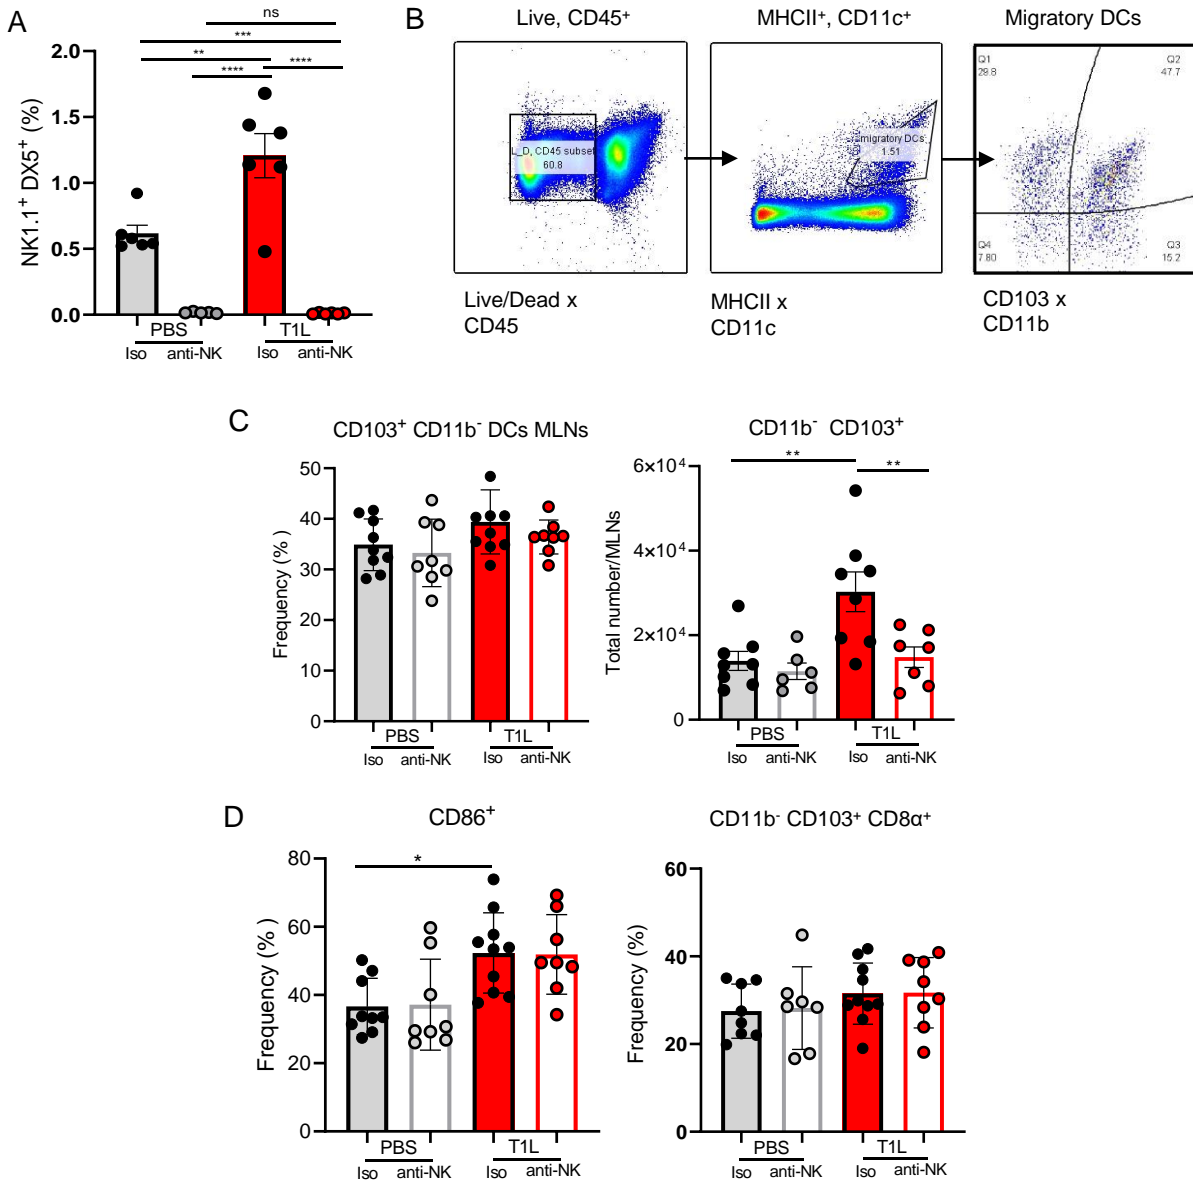

81

82 **Supplemental Figure 3. Characterization of migratory DCs during T1L infection following NK cell**

83 **depletion.** WT mice were intraperitoneally injected with either isotype control IgG2a antibody or anti-NK1.1

84 antibody (PK136) one day prior to and one day following PO inoculation with 10<sup>8</sup> PFU of T1L or PBS as a

85 control. At 2 dpi, MLNs were resected and processed for flow cytometry. Single-cell suspensions were

86 incubated with brefeldin A in the presence of Golgi Plug at 37°C for 6 hours (n = 8-10). **(A)** Validation of NK

87 cell depletion in MLNs. **(B)** Example flow gating strategy for CD103<sup>+</sup> CD11b<sup>-</sup> migratory DCs in the MLNs.

88 **(C)** Frequency and total number of migratory tolerogenic DCs (CD11c<sup>int</sup> MHCII<sup>+</sup> CD103<sup>+</sup> CD11b<sup>-</sup>) in the

89 MLNs (n=6-8). **(D)** Frequency of CD103<sup>+</sup> CD11b<sup>-</sup> that express CD8α or CD86 (n=6-8). Results are

90 presented as mean values. Error bars indicate standard errors of the mean (SEM). Statistical significance  
91 was calculated using one-way ANOVA with Tukey's multiple comparisons test. \*,  $P < 0.05$ ; \*\*,  $P < 0.01$ ; \*\*\*,  
92  $P < 0.001$ ; \*\*\*\*,  $P < 0.0001$ .

93
